# Supplementary material
Source: Springer Nature journal article supplement (https://www.springermedizin.de/resource/supplementary/12936_2010_1598_MOESM2_ESM.pdf/9541618)

**A**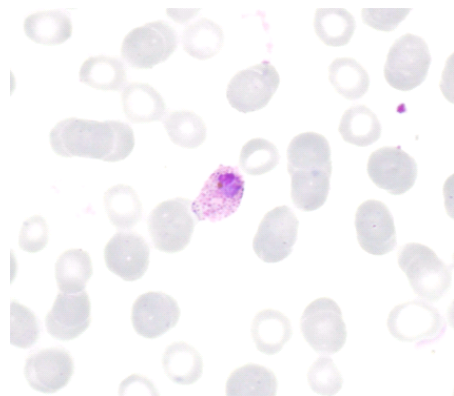**B**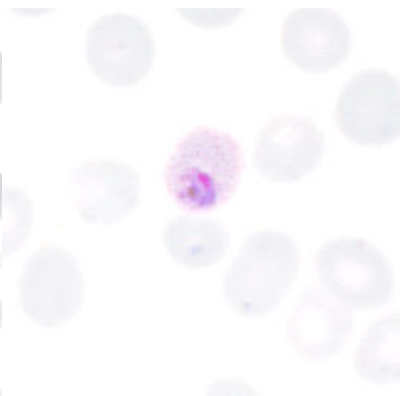**C**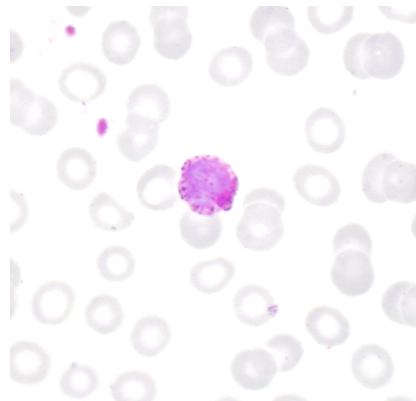**D**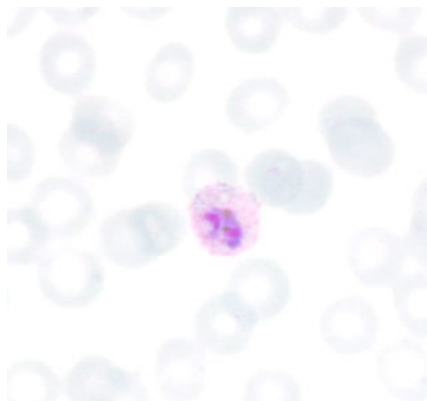

Supplement: MOESM2 [file 9541618]
